# Supplementary material
Source: HighWire-hosted journal article supplement (https://www.cmaj.ca/highwire/filestream/77360/field_highwire_adjunct_files/0/200143-ana-1-at.pdf)
Supplement: 200143-ana-1-at.pdf [file 200143-ana-1-at.pdf]

## Appendix 1 (as submitted by the authors): Supplementary data

### Box 1: Sources of data and methods

#### Meetings

The interchanges between the provincial/territorial (PT) and federal governments on health care funding since the 1990s are well-documented in publicly released communiqués and associated documents from the following sources.

Premiers: The premiers meet at least annually during the summer months and have occasional interim meetings. Before 2004, these records are available from the Canadian Intergovernmental Conference Secretariat (CICS; searchable by keyword and date, <https://scics.gc.ca/en/newsroom>). Since the establishment of the Council of the Federation (Cof) in 2003, records are available from [www.canadaspremiers.ca/newsroom](http://www.canadaspremiers.ca/newsroom) (indexed chronologically).

Health ministers: Health ministers meet sporadically. The last meeting was in June 2018. The format is generally a 2-day meeting, with PT health ministers meeting on the first day, and the federal health minister joining for the second day. Provincial and territorial ministers usually issue a communiqué, with joint statements more rarely issued from the second federal and PT day of meetings. Records are available from the CICS Web site.

First ministers: Three First Minister's meetings on health have occurred since the 1990s, in September 2000, February 2003 and September 2004. Records are available from the CICS Web site.

#### Financial data

Federal contribution to Medicare pre-established programs financing — fiscal year 1976/77

Federal contribution: Table 7.26 Contributions to the provinces under the Hospital Insurance and Diagnostic Services Act, Year ended Mar. 31, 1977 (does not include Quebec), and Table 7.27 Contributions to provinces under the *Medical Care Act*, year ended Mar. 31, 1977.<sup>1</sup>

Provincial and territorial spending on hospitals and physician services: Tables F.2.1.1 Provincial/territorial government health expenditure by use of funds in millions of current dollars, Canada, 1974/75 to 2019/20, and F.3.5.1 Provincial/territorial government health expenditure by use of funds in millions of current dollars, Quebec, 1974/75 to 2019/20.<sup>2</sup>

Federal contribution to Medicare and to total PT health spending — fiscal year 2019/20

Federal cash contribution: see reference 3.

Federal tax point contribution: see reference 4. Series ended 2013/14, thereafter escalated to 2019/20 by annual percentage changes in the total value of the tax points as calculated by the Department of Finance Canada.<sup>5</sup>

Provincial and territorial spending on hospitals and physician services and total PT health spending: Table F.2.1.1.<sup>2</sup>

#### References

1. Goyer J. *Public accounts of Canada 1977*. Volume I: Summary report and financial statements. Ottawa: Minister of Supply and Services Canada; 1977.
2. Canadian Institute for Health Information. National health expenditure trends data tables. Available: [www.cihi.ca/sites/default/files/document/nhex-2019-full-datatables-en.zip](http://www.cihi.ca/sites/default/files/document/nhex-2019-full-datatables-en.zip) (accessed 2019 Jan. 4).
3. Department of Finance Canada. Federal support to provinces and territories 2011/12 to 2020/21. Available: <https://www.fin.gc.ca/fedprov/mtp-eng.asp> (accessed 2020 Feb. 4).

Appendix to: Naylor CD, Boozary A, Adams O. Canadian federal-provincial/territorial funding of universal health care: fraught history, uncertain future. *CMAJ* 2020. doi: 10.1503/cmaj.200143.

Copyright © 2020 The Author(s) or their employer(s).

To receive this resource in an accessible format, please contact us at [cmajgroup@cmaj.ca](mailto:cmajgroup@cmaj.ca).

4. Department of Finance Canada. Historical transfer tables: 1980 to present. Canada Health Transfer (tax component). <https://open.canada.ca/data/en/dataset/4eee1558-45b7-4484-9336-e692897d393f> (accessed 2020 Jan. 4).
5. Report on federal tax expenditures: concepts, estimates and evaluations 2019. Transfer of income tax points to provinces. Available: <https://www.fin.gc.ca/taxexp-depfisc/2019/taxexp-depfisc19-eng.pdf> (accessed 2020 Jan. 4).
